# Supplementary material for: Effect of CYP2C9, VKORC1, and CYP4F2 polymorphisms on warfarin maintenance dose in children aged less than 18 years: a protocol for systematic review and meta-analysis
Source: Springer Nature journal article supplement (doi:10.1186/s13643-016-0280-y), 2016-06-23
Supplement: MOESM3 [file 10284012]

**STUDY ELIGIBILITY FORM**

| <b>FACTORS</b>                                                                                                                                                                                              | <b>ASSESSMENT</b>                          | <b>COMMENTS</b>      |
|-------------------------------------------------------------------------------------------------------------------------------------------------------------------------------------------------------------|--------------------------------------------|----------------------|
| <b>TYPE OF STUDY</b>                                                                                                                                                                                        |                                            |                      |
| 1. Is the study described as observational (cohort, case control, or cross-sectional) study or randomized controlled trial?                                                                                 | Yes    Unclear    No<br><br><b>Exclude</b> |                      |
| <b>PARTICIPANTS</b>                                                                                                                                                                                         |                                            |                      |
| 2. Were participants treated with warfarin?                                                                                                                                                                 | Yes    Unclear    No<br><br><b>Exclude</b> |                      |
| 3. Were participants of the postspecified age?<br><br>NB: Please answer „Yes“, If mix age participants i.e. both <=18 years and >18 years are included and state it as comments.<br>No: If only > 18 years. | Yes    Unclear    No<br><br><b>Exclude</b> | Subgroups available? |
| <b>Genotyping</b>                                                                                                                                                                                           |                                            |                      |
| 4. Were study participants performed SNPs analysis (CYP2C9, VKORC1, or CYP4F2)?                                                                                                                             | Yes    Unclear    No<br><br><b>Exclude</b> |                      |
| <b>OUTCOMES</b>                                                                                                                                                                                             |                                            |                      |
| 5. Did the study report warfarin maintenance dose?                                                                                                                                                          | Yes    Unclear    No<br><br><b>Exclude</b> |                      |
| <b>FINAL DECISION</b><br><br>1 X "No"        = EXCLUDE<br><br>1 X "Unclear" = UNCLEAR                                                                                                                       | Include    Unclear    Exclude              |                      |



| STUDY CHARACTERISTICS                   |                                                                                                                                                                                                                     |                                                                                                                                                                                                                             |                                                                                                                                                                                                     |
|-----------------------------------------|---------------------------------------------------------------------------------------------------------------------------------------------------------------------------------------------------------------------|-----------------------------------------------------------------------------------------------------------------------------------------------------------------------------------------------------------------------------|-----------------------------------------------------------------------------------------------------------------------------------------------------------------------------------------------------|
| Sample size                             | Randomized / Recruited / Number ( )                                                                                                                                                                                 |                                                                                                                                                                                                                             |                                                                                                                                                                                                     |
| Number of excluded patients             | No / NA / Yes (N= )                                                                                                                                                                                                 |                                                                                                                                                                                                                             |                                                                                                                                                                                                     |
| Recruitment method                      | consecutive inclusion / N/A / Others ( )                                                                                                                                                                            |                                                                                                                                                                                                                             |                                                                                                                                                                                                     |
| Setting                                 | in-patient / out-patient / unclear / NR                                                                                                                                                                             |                                                                                                                                                                                                                             |                                                                                                                                                                                                     |
| Location of trial                       |                                                                                                                                                                                                                     |                                                                                                                                                                                                                             |                                                                                                                                                                                                     |
| Dates of Recruitment                    | From ( Day/Month/Year ) To ( Day/Month/Year )                                                                                                                                                                       |                                                                                                                                                                                                                             |                                                                                                                                                                                                     |
| Study Design                            | RCT / Cohort / Cross-sectional / Others<br>Single center / Multicenter trial: international / national / # centers: __<br>Prospective / Retrospective                                                               |                                                                                                                                                                                                                             |                                                                                                                                                                                                     |
| Aim of study                            | Warfarin dose requirement / Time to stable dose<br>ADE (e.g. severe bleeding or thrombosis)<br>Others ( )                                                                                                           |                                                                                                                                                                                                                             |                                                                                                                                                                                                     |
| Funding                                 | Industry / Public / Mixed (industry supported: drug /<br>data management / travel / salary / other<br>unclear / NR                                                                                                  |                                                                                                                                                                                                                             |                                                                                                                                                                                                     |
| Conflict of interest statement          | Yes <input type="checkbox"/> / No <input type="checkbox"/> / NR <input type="checkbox"/>                                                                                                                            |                                                                                                                                                                                                                             |                                                                                                                                                                                                     |
| Tested SNPs                             | CYP2C9                                                                                                                                                                                                              | VKORC1                                                                                                                                                                                                                      | CYP4F2                                                                                                                                                                                              |
|                                         | Yes <input type="checkbox"/> / No <input type="checkbox"/><br>*2 (rs1799853)<br>*3 (rs1057910)<br>Others ( )<br>P<0.05?<br>Yes <input type="checkbox"/> / No <input type="checkbox"/> / NA <input type="checkbox"/> | Yes <input type="checkbox"/> / No <input type="checkbox"/><br>G1639A (rs9923231)<br>C1173T (rs9934438)<br>Others ( )<br>P<0.05?<br>Yes <input type="checkbox"/> / No <input type="checkbox"/> / NA <input type="checkbox"/> | Yes <input type="checkbox"/> / No <input type="checkbox"/><br>V433M (rs2108622)<br>Others ( )<br>P<0.05<br>Yes <input type="checkbox"/> / No <input type="checkbox"/> / NA <input type="checkbox"/> |
| Definition of warfarin maintenance dose |                                                                                                                                                                                                                     |                                                                                                                                                                                                                             |                                                                                                                                                                                                     |
| Comments                                |                                                                                                                                                                                                                     |                                                                                                                                                                                                                             |                                                                                                                                                                                                     |

| <b>PATIENTS CHARACTERISTICS</b> |                                                                                                                                                                                                                                                                                                                                |
|---------------------------------|--------------------------------------------------------------------------------------------------------------------------------------------------------------------------------------------------------------------------------------------------------------------------------------------------------------------------------|
| Age (year)                      | Mean ( ) / Median ( ) / Mode ( )<br>SD ( ) / SE ( ) / Minimum ( ) / Maximum ( )<br>1st Quartile ( ) / 3rd Quartile ( )<br>95% CI inferior ( ) / 95% CI superior ( )                                                                                                                                                            |
| Gender (Number)                 | Male ( ) / Female ( )                                                                                                                                                                                                                                                                                                          |
| Race (Number)                   | Caucasian ( ) / Asian ( )<br>African ( ) / Others ( )<br>Comment:                                                                                                                                                                                                                                                              |
| Concomitant drug information    | NA / Available                                                                                                                                                                                                                                                                                                                 |
| Diet information                | NA / Available                                                                                                                                                                                                                                                                                                                 |
| Indication for warfarin         | Congenital or aquired heart disease (N= )<br>Fontan (N= ) / Heart valve replacement (N= )<br>Cardiomyopathy (N= ) / Coronary aneurysms (N= )<br>Pulmonary hypertension (N= )<br>Other cardiac disorders (N= , )<br><br>Non-Cardiac disorder (N= )<br>Deep vein thrombosis (N= ) / Stroke (N= )<br><br>Other conditions (N= , ) |
| Target INR range                | NA / Available                                                                                                                                                                                                                                                                                                                 |
| Comments                        |                                                                                                                                                                                                                                                                                                                                |

| OUTCOME MEASUREMENT (Warfarin Maintenance dose) |                       |               |      |      |        |    |     |     |                 |                 |
|-------------------------------------------------|-----------------------|---------------|------|------|--------|----|-----|-----|-----------------|-----------------|
|                                                 | Data available        | Sample number | Unit | Mean | Median | SD | MIN | MAX | 95% CI Inferior | 95% CI Superior |
| CYP2C9                                          |                       |               |      |      |        |    |     |     |                 |                 |
|                                                 | *1/*1                 |               |      |      |        |    |     |     |                 |                 |
|                                                 | *1/*2                 |               |      |      |        |    |     |     |                 |                 |
|                                                 | *1/*3                 |               |      |      |        |    |     |     |                 |                 |
|                                                 | *2/*3                 |               |      |      |        |    |     |     |                 |                 |
|                                                 | *2/*2                 |               |      |      |        |    |     |     |                 |                 |
|                                                 | *3/*3                 |               |      |      |        |    |     |     |                 |                 |
|                                                 | Variant Hetrozygus    |               |      |      |        |    |     |     |                 |                 |
|                                                 | Variant Homozygus     |               |      |      |        |    |     |     |                 |                 |
|                                                 | Variant (any *2 or*3) |               |      |      |        |    |     |     |                 |                 |
| VKORC1                                          |                       |               |      |      |        |    |     |     |                 |                 |
|                                                 | 1639-GG               |               |      |      |        |    |     |     |                 |                 |
|                                                 | 1639-GA               |               |      |      |        |    |     |     |                 |                 |
|                                                 | 1639-AA               |               |      |      |        |    |     |     |                 |                 |
|                                                 | 1639-GA or -GG        |               |      |      |        |    |     |     |                 |                 |
|                                                 | 1173-CC               |               |      |      |        |    |     |     |                 |                 |
|                                                 | 1173-CT               |               |      |      |        |    |     |     |                 |                 |
|                                                 | 1173-TT               |               |      |      |        |    |     |     |                 |                 |
|                                                 | 1173-CT or -TT        |               |      |      |        |    |     |     |                 |                 |
| CYP4F2                                          |                       |               |      |      |        |    |     |     |                 |                 |
|                                                 | V433M, TT             |               |      |      |        |    |     |     |                 |                 |
|                                                 | V433M, CT             |               |      |      |        |    |     |     |                 |                 |
|                                                 | V433M, CC             |               |      |      |        |    |     |     |                 |                 |
|                                                 | V433M, CT or CC       |               |      |      |        |    |     |     |                 |                 |

## Newcastle-Ottawa Quality Assessment Scale for Cohort Studies

### Selection

- 1) Representativeness of the variant genotypes in each SNP
  - a) truly representative in the community ☆
  - b) somewhat representative in the community ☆
  - c) selected group of users
  - d) no description of the derivation of the cohort
- 2) Selection of the wild genotype in each SNP
  - a) drawn from the same community as the exposed cohort ☆
  - b) drawn from a different source
  - c) no description of the derivation of the non exposed cohort
- 3) Ascertainment of genotype
  - a) secure record ☆
  - b) structured interview ☆
  - c) written self report
  - d) no description
- 4) Demonstration of genotyping was not present at start of study
  - a) yes ☆
  - b) no

### Comparability

- 1) Comparability of cohorts on the basis of the design or analysis
  - a) study controls for body size or age ☆
  - b) study controls for any additional factor (e.g. target INR range, indication, or diet) ☆

### Outcome

- 1) Assessment of outcome
  - a) independent blind assessment ☆
  - b) record linkage ☆
  - c) self report
  - d) no description
- 2) Was follow-up long enough for outcomes to occur
  - a) yes (more than 1 month of stable warfarin control) ☆
  - b) no
- 3) Adequacy of follow up of cohorts
  - a) complete follow up - all subjects accounted for at least 1 months ☆
  - b) subjects lost to follow up unlikely to introduce bias - small number lost <10 % ☆
  - c) follow up rate < 90% and no description of those lost
  - d) no statement

Total number of stars:                      stars
